# Supplementary material for: Endothelial Foxo1 Phosphorylation Inhibition via Aptamer‐Liposome Alleviates OPN‐Induced Pathological Vascular Remodeling Following Spinal Cord Injury
Source: PubMed Central journal article supplement (PMC11578346; doi:10.1002/advs.202406398), 2024-09-28

# ADVANCED SCIENCE

Open Access

## Supporting Information

for *Adv. Sci.*, DOI 10.1002/adv.202406398

Endothelial Foxo1 Phosphorylation Inhibition via Aptamer-Liposome Alleviates  
OPN-Induced Pathological Vascular Remodeling Following Spinal Cord Injury

*Jiaqi Xu, Chaoran Shi, Yinghe Ding, Tian Qin, Chengjun Li, Feifei Yuan, Yudong Liu, Yong Xie,  
Yiming Qin, Yong Cao, Tianding Wu, Chunyue Duan, Hongbin Lu\*, Jianzhong Hu\* and Liyuan  
Jiang\**

**Figure 2A**

PageRuler™ Plus 10-250 kDa 26619

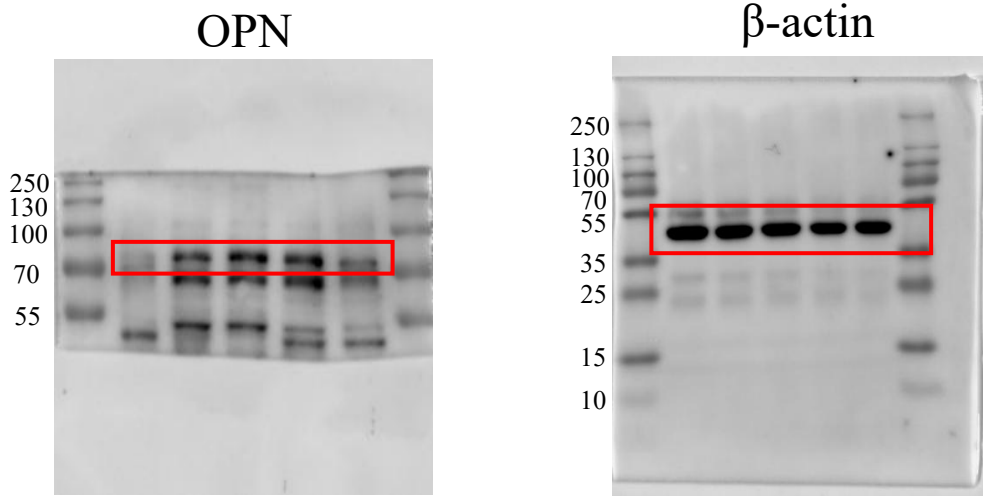

**Figure 4D**

PageRuler™ Plus 10-180 kDa 26616

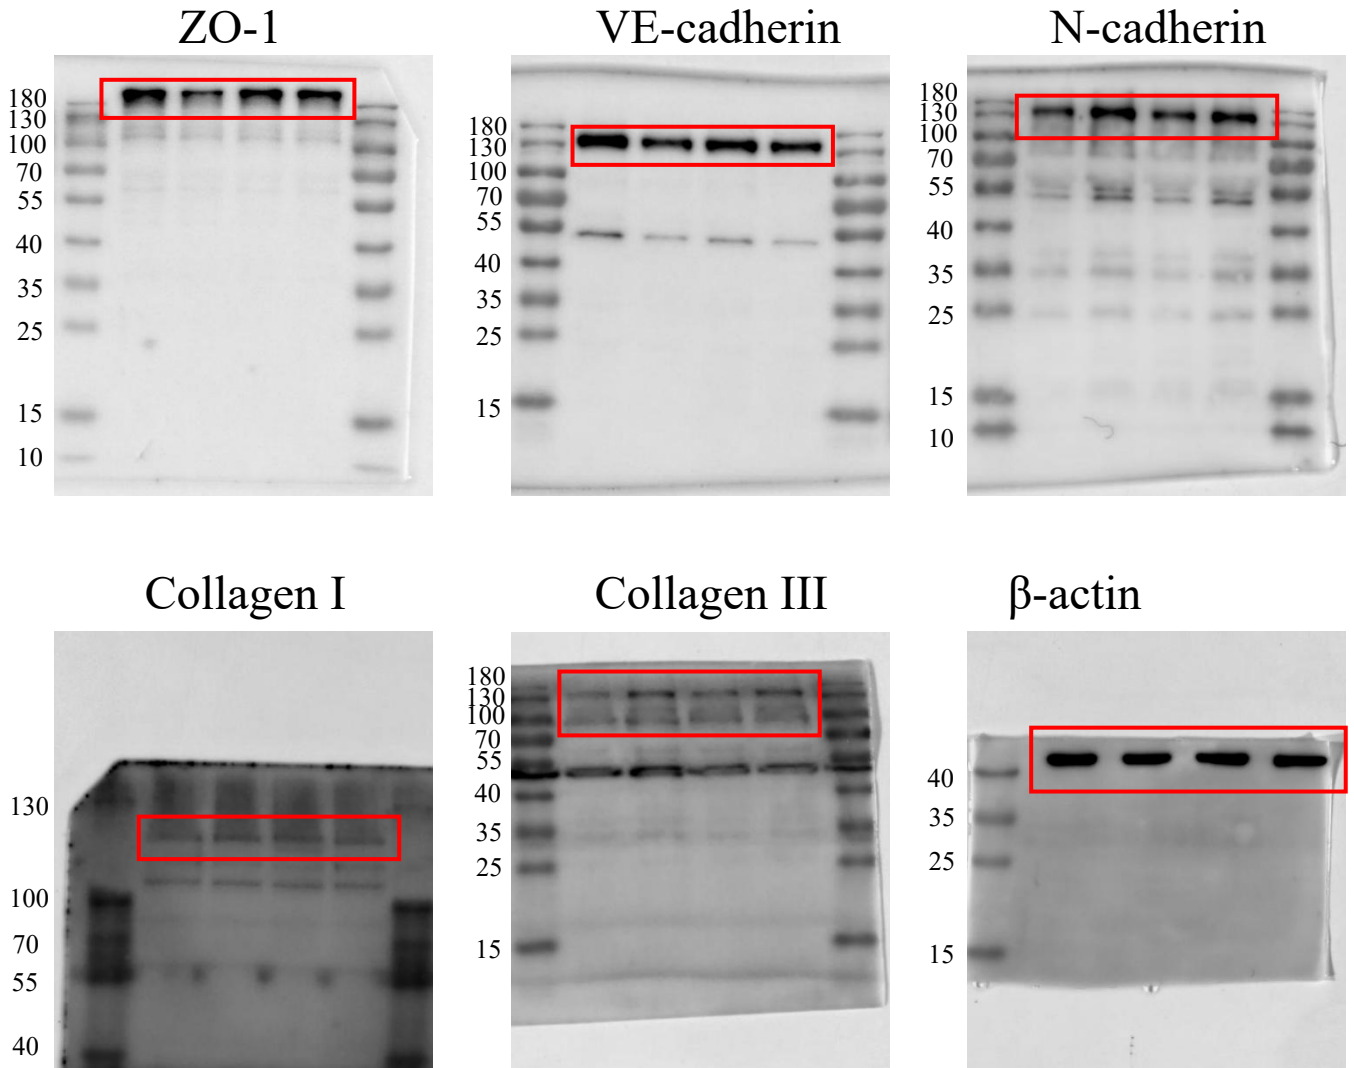

**Figure 4F**

PageRuler™ Plus 10-180 kDa 26616

**Claudin 5**

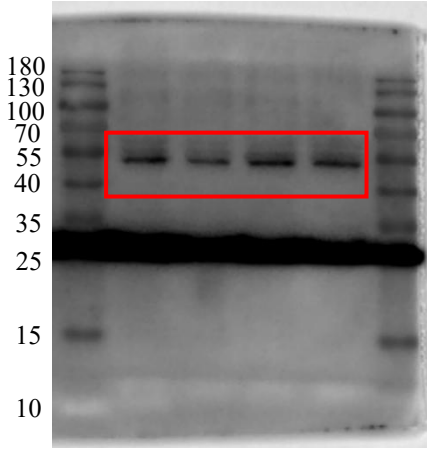

**Occuldin**

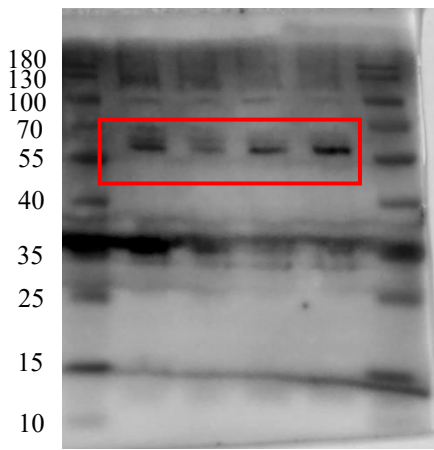

**ZO-1**

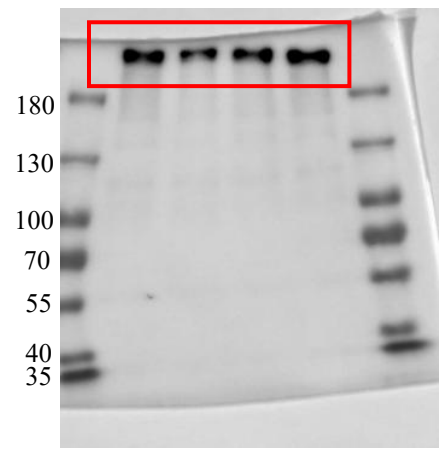

**VE-cadherin**

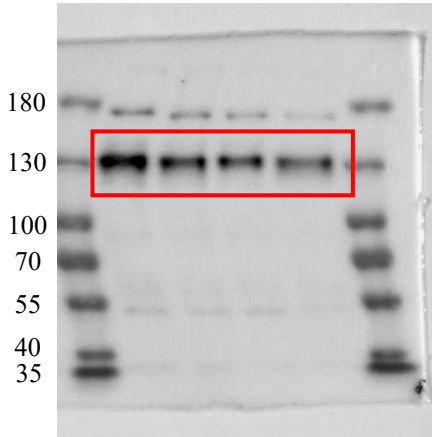

**N-cadherin**

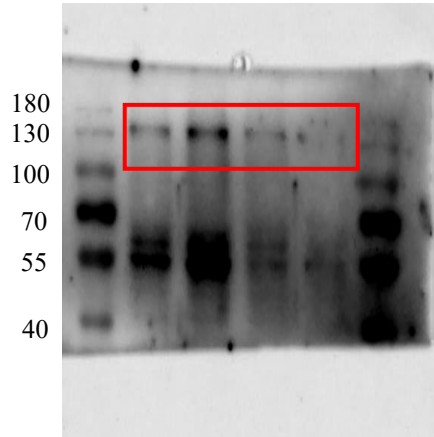

**Collagen I**

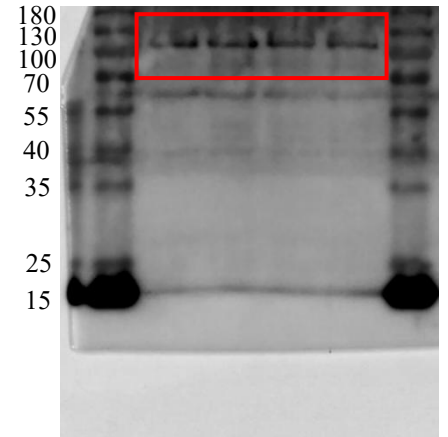

**Collagen III**

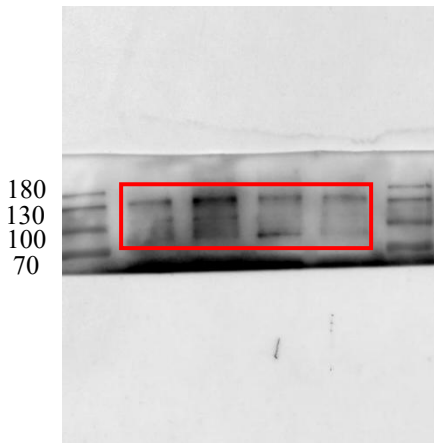

**$\beta$ -actin**

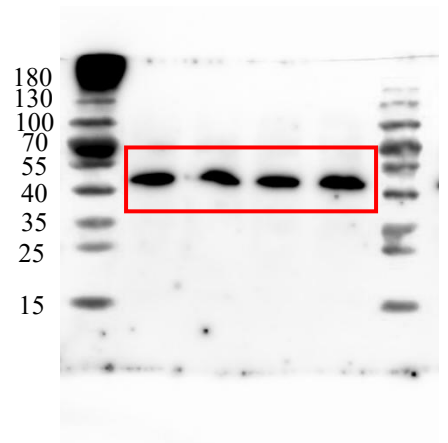

# Figure 5E

PageRuler™ Plus 10-180 kDa 26616

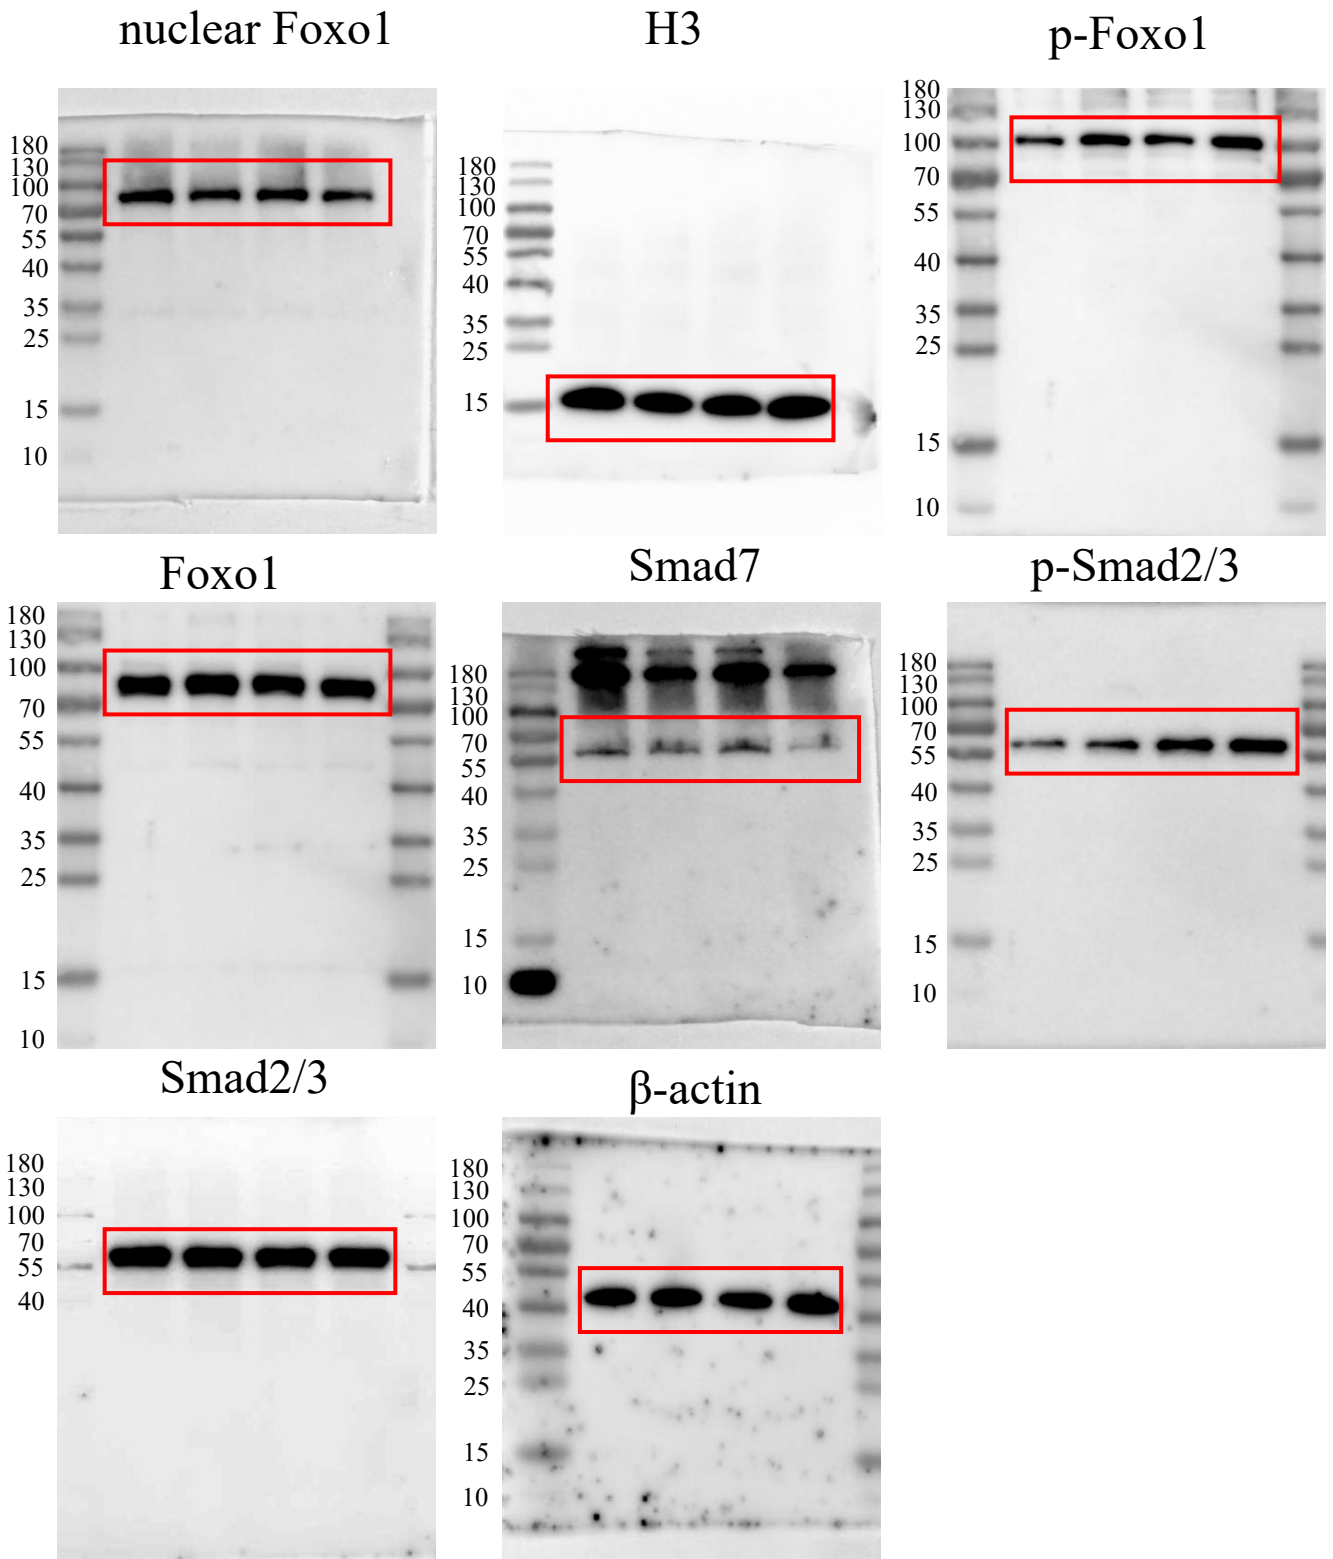

# Figure 5H

PageRuler™ Plus 10-180 kDa 26616

ZO-1

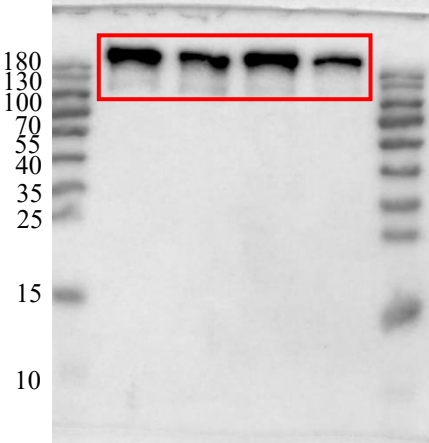

VE-cadherin

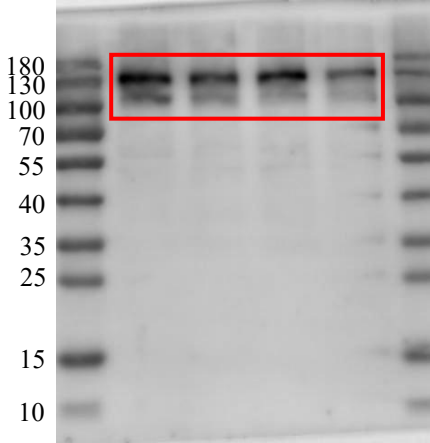

N-cadherin

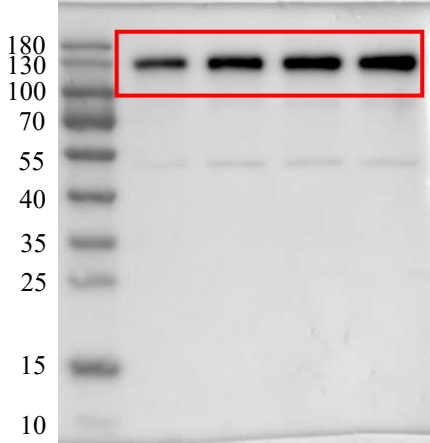

Collagen I

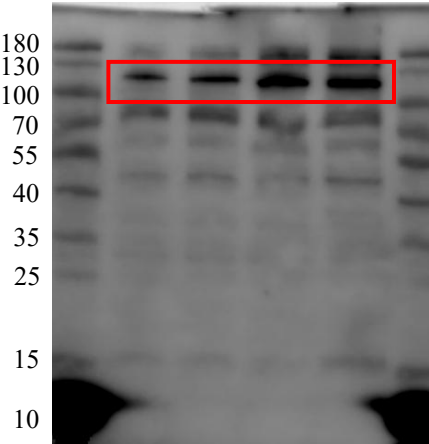

Collagen III

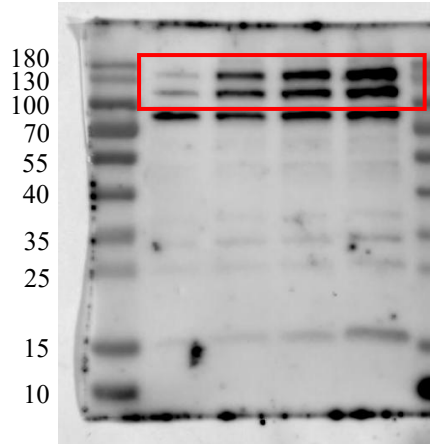

$\beta$ -actin

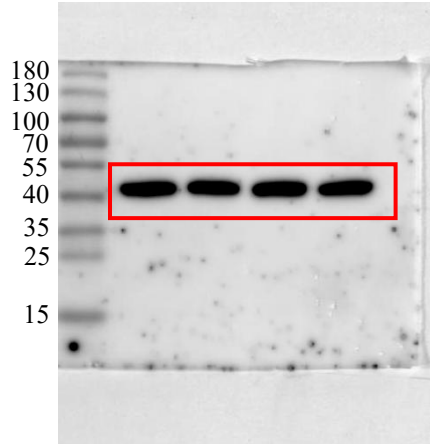

# Figure 6D

PageRuler™ Plus 10-250 kDa 26619

p-Foxo1

Foxo1

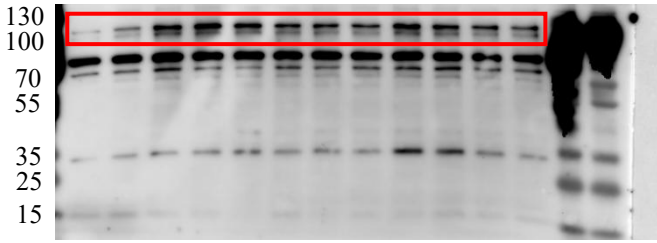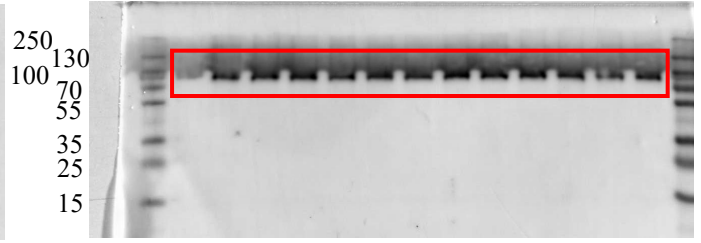

PageRuler™ Plus 10-180 kDa 26616

Smad7

ZO-1

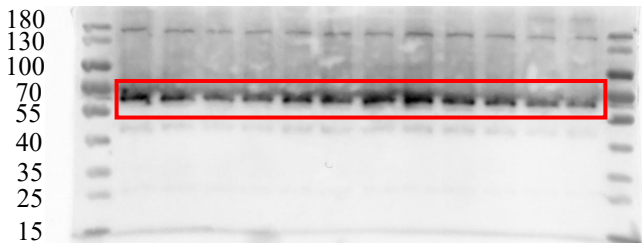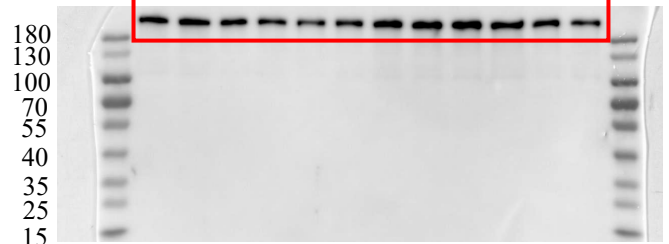

VE-cadherin

N-cadherin

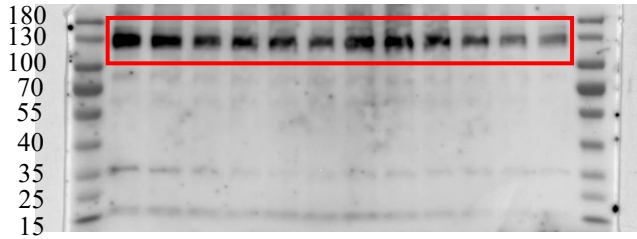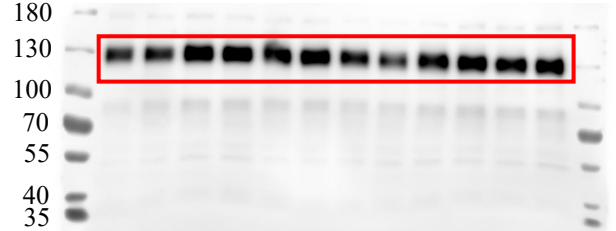

Collagen I

Collagen III

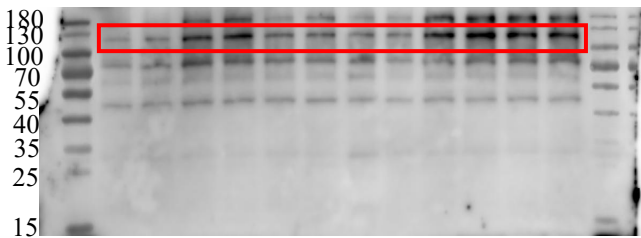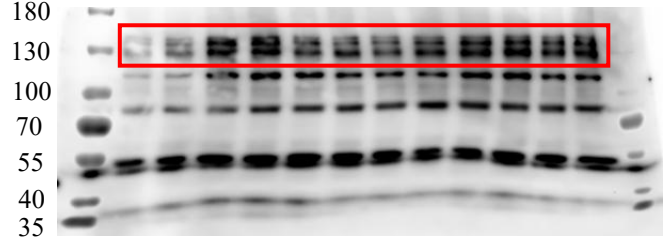

$\beta$ -actin

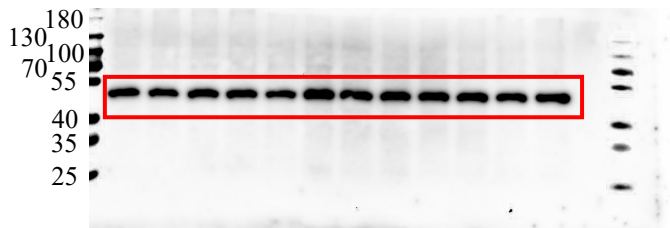

**Figure S4C**

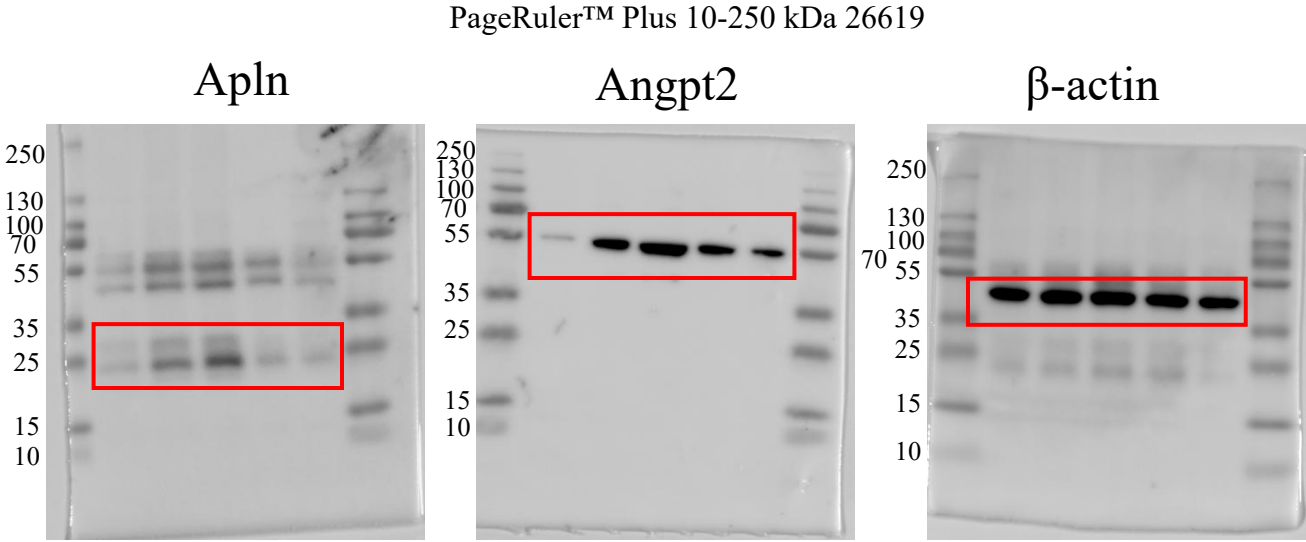

**Figure S7A**

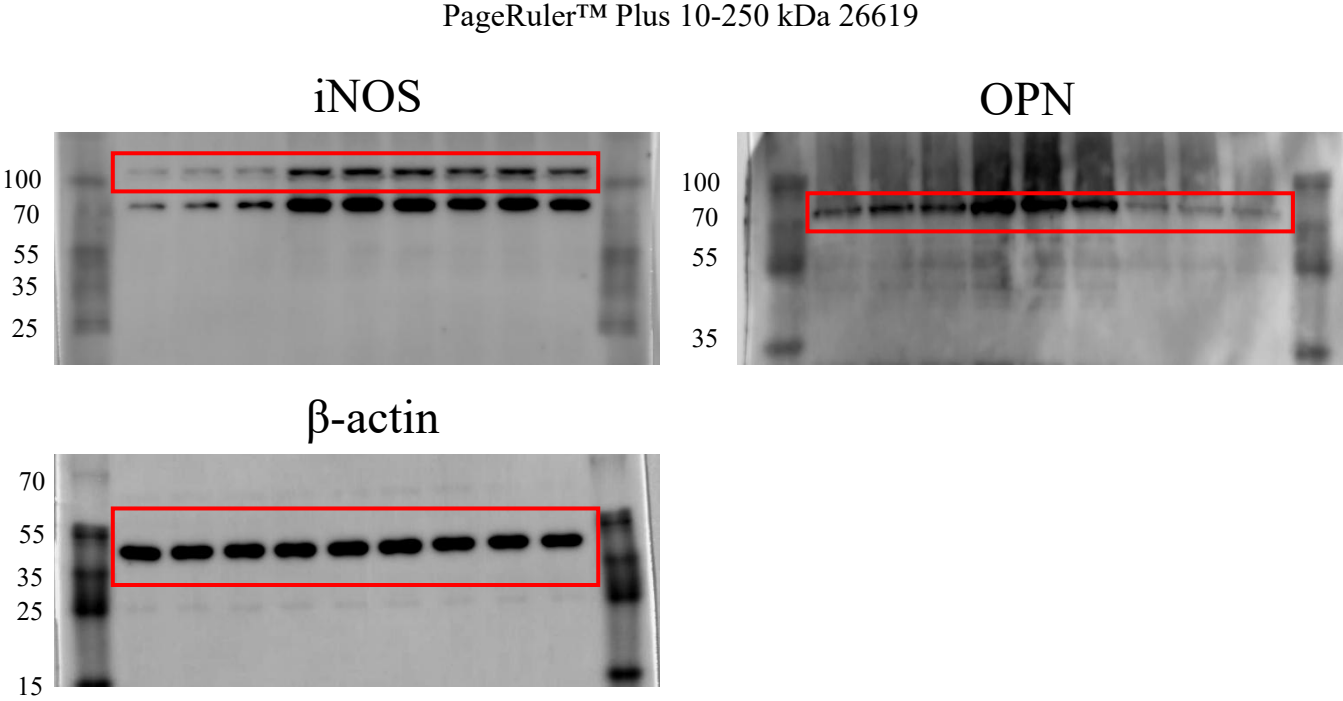

# Figure S7C

PageRuler™ Plus 10-180 kDa 26616

p-Akt

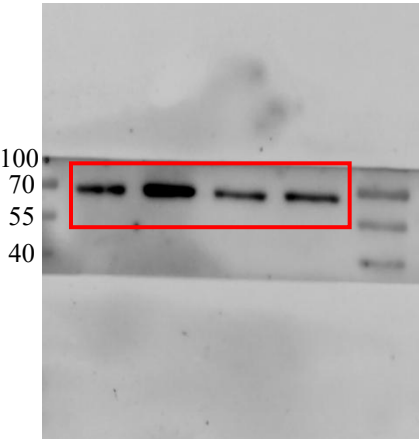

Akt

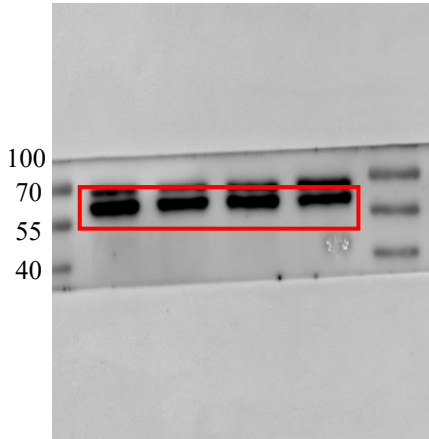

Apln

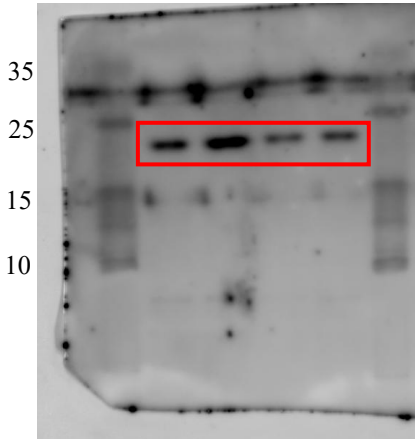

Angpt2

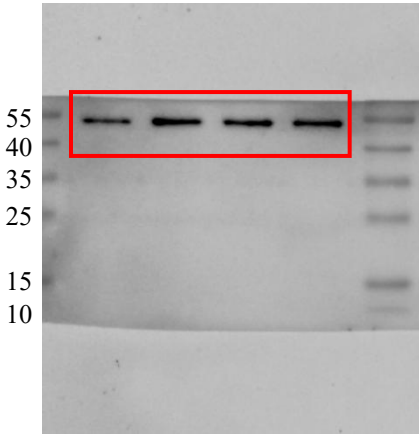

Ki67

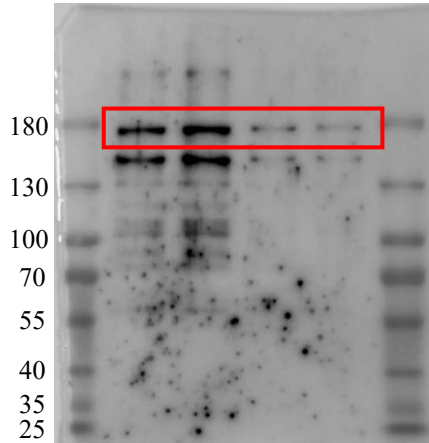

$\beta$ -actin

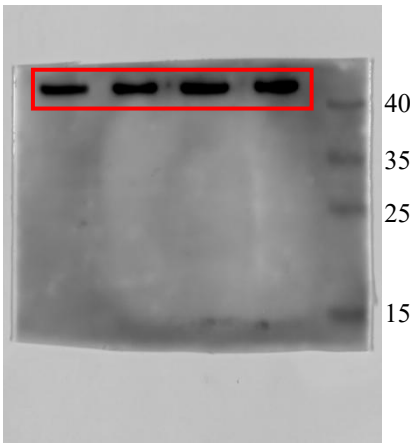



# Figure S8E

PageRuler™ Plus 10-180 kDa 26616

### Foxo1

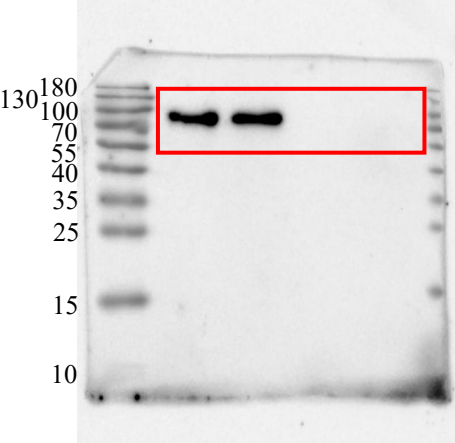

### Smad7

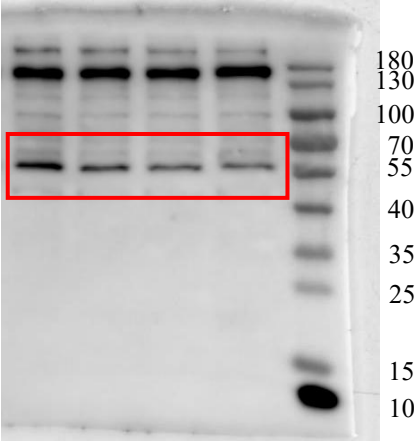

### p-Smad2/3

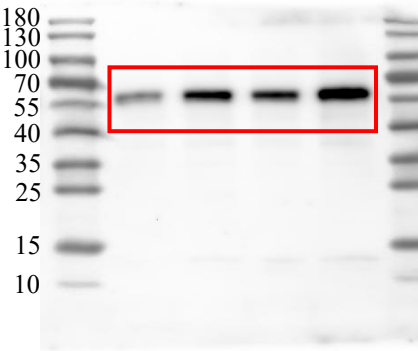

### Smad2/3

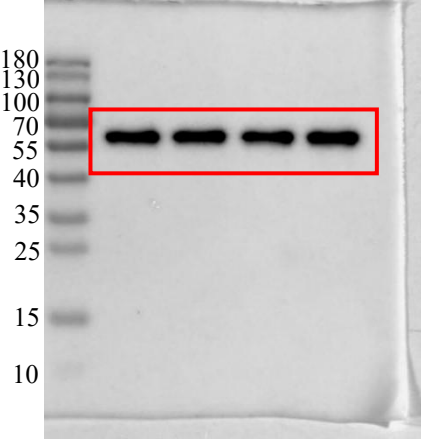

### β-actin

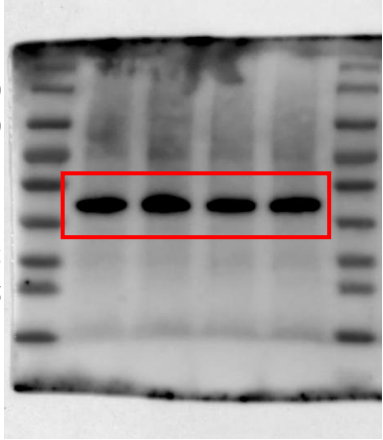

# Figure S8H

PageRuler™ Plus 10-180 kDa 26616

p-Smad2/3

Smad2/3

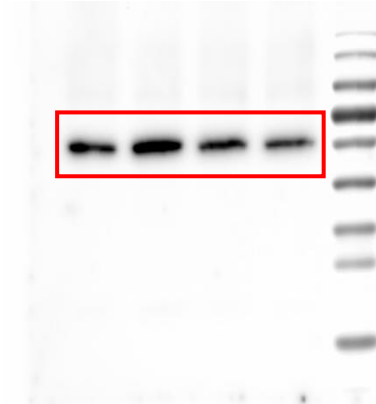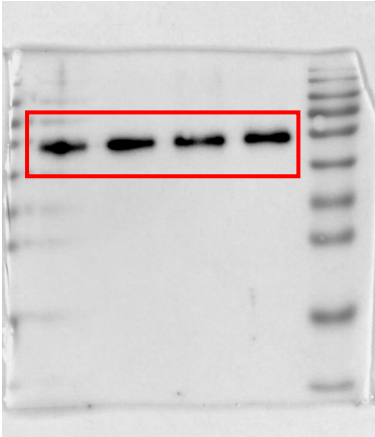

p-mTOR

mTOR

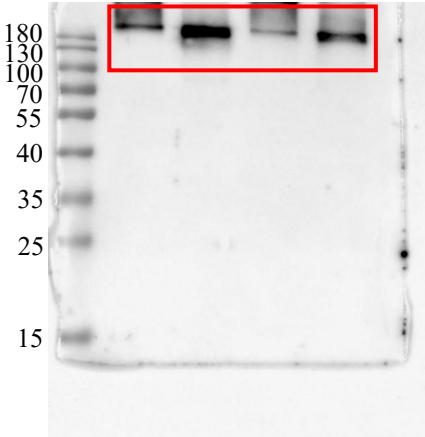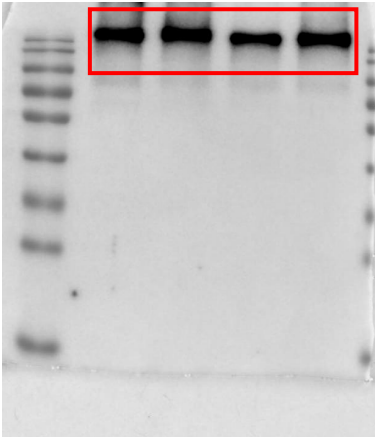

p-GSK-3β

GSK-3β

β-actin

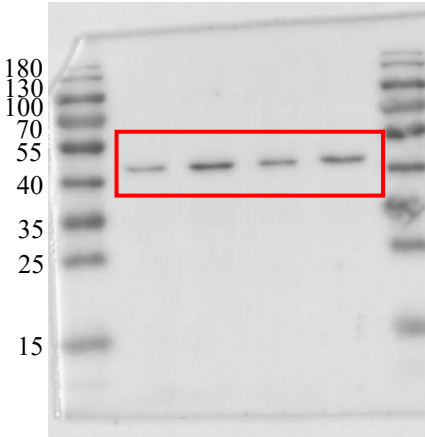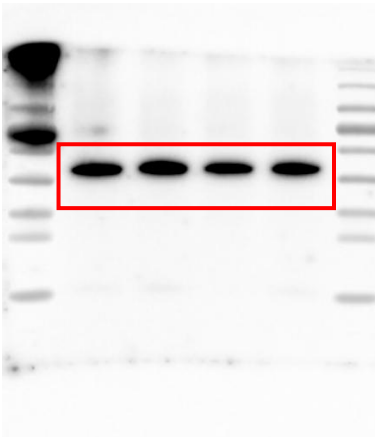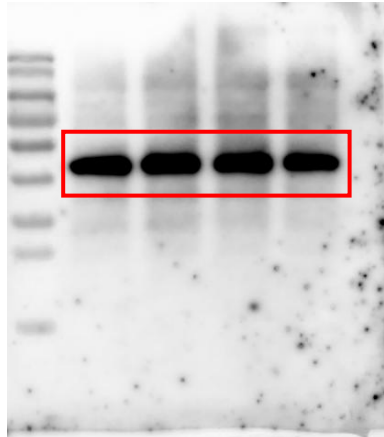

Supplement: ADVS-11-2406398-s002.pdf [file ADVS-11-2406398-s002.pdf]
